# Supplementary material
Source: PubMed Central journal article supplement (PMC7755947)
Supplement: DS_10.1177_2380084420962778.pdf [file DS_10.1177_2380084420962778.pdf]

**Appendix material for “Characteristics of US adults delaying dental care due to the COVID-19 pandemic”**

**Appendix Table. Characteristics of survey respondents**

|                                               | <b>Weighted Percentage</b> | <b>Unweighted Count</b> |
|-----------------------------------------------|----------------------------|-------------------------|
| <b>All</b>                                    | 100.0                      | 2,387                   |
| <b>Sex</b>                                    |                            |                         |
| Male                                          | 48.2                       | 1,024                   |
| Female                                        | 51.8                       | 1,363                   |
| <b>Age Group</b>                              |                            |                         |
| <40 years                                     | 28.7                       | 286                     |
| 40-54 years                                   | 29.2                       | 566                     |
| 55-64 years                                   | 18.8                       | 665                     |
| 65 years and older                            | 23.4                       | 871                     |
| <b>Race</b>                                   |                            |                         |
| White                                         | 75.3                       | 1,920                   |
| Black                                         | 12.2                       | 221                     |
| American Indian and Alaskan Native            | 1.8                        | 27                      |
| Asian and Pacific Islander                    | 3.3                        | 71                      |
| Other                                         | 7.4                        | 148                     |
| <b>Hispanic ethnicity</b>                     |                            |                         |
| Hispanic                                      | 18.7                       | 334                     |
| Not Hispanic                                  | 81.3                       | 2,054                   |
| <b>Rurality*</b>                              |                            |                         |
| Urban                                         | 78.5                       | 1,860                   |
| Rural                                         | 21.6                       | 521                     |
| <b>Census division of current residence**</b> |                            |                         |
| New England                                   | 4.3                        | 111                     |
| Middle Atlantic                               | 15.6                       | 321                     |
| East North Central                            | 12.9                       | 312                     |
| West North Central                            | 4.8                        | 123                     |
| South Atlantic                                | 16.6                       | 399                     |
| East South Central                            | 3.5                        | 93                      |
| West South Central                            | 15.3                       | 343                     |
| Mountain                                      | 9.9                        | 258                     |
| Pacific                                       | 17.1                       | 426                     |

Note. Table presents weighted percentages. \*Six respondents had missing information about rurality.

\*\*One respondent had missing information about Census division.
